# Supplementary material for: Muscarinic M1 receptors modulate endotoxemia-induced loss of synaptic plasticity
Source: Springer Nature journal article supplement (doi:10.1186/s40478-015-0245-8), 2015-11-04
Supplement: MOESM2 [file 25665804]

Additional file 2

Patient #1

| vital parameters                                |                    |          |
|-------------------------------------------------|--------------------|----------|
| measurement                                     | units              | result   |
| haemodynamics                                   |                    |          |
| systolic arterial pressure                      | mmHg               | 131      |
| diastolic arterial pressure                     | mmHg               | 68       |
| mean arterial pressure                          | mmHg               | 88       |
| central venous pressure                         | cmH <sub>2</sub> O | 6        |
| heart rate                                      | min <sup>-1</sup>  | 67       |
| catecholamine                                   |                    |          |
| noradrenaline                                   | µg/kg/min          | 0        |
| vasopressin                                     | U/kg/min           | 0        |
| dobutamine                                      | mg/kg/min          | 0        |
| adrenaline                                      | µg/kg/min          | 0        |
| other medication                                |                    |          |
| hydrocortisone                                  | mg/24h             | 0        |
| furosemide                                      | mg/24h             | 0        |
| sedation                                        |                    |          |
| dexmedetomidine                                 | µg/kg/min          | 0.3      |
| fluid replacement                               |                    |          |
| cristalloids                                    | ml/24h             | 3429     |
| colloids                                        | ml/24h             | 0        |
| enteral feeding                                 | ml/24h             | 1410     |
| red cell concentrate                            | ml/24h             | 0        |
| fresh frozen plasma                             | ml/24h             | 0        |
| thrombocyte concentrate                         | ml/24h             | 0        |
| coagulation factors                             | U/24h              | 0        |
| fluid loss                                      |                    |          |
| urine                                           | ml/24h             | 560      |
| hemodialysis                                    | ml/24h             | 4830     |
| abdominal drainage                              | ml/24h             | 30       |
| pleural drainage                                | ml/24h             | 0        |
| fluid balance                                   |                    |          |
| total                                           | (+/-) ml/24h       | -581     |
| scores                                          |                    |          |
| RASS                                            |                    | -1       |
| CAM ICU                                         |                    | positive |
| ICDSC                                           |                    | 6        |
| ventilation                                     |                    |          |
| fraction of inspired oxygen (FiO <sub>2</sub> ) |                    | 0.4      |
| respiratory rate                                | min <sup>-1</sup>  | 20       |
| mode                                            |                    | CPAP     |

| laboratory diagnostics                       |                  |        |
|----------------------------------------------|------------------|--------|
| measurement                                  | units            | result |
| infectiology                                 |                  |        |
| white blood cells                            | nl <sup>-1</sup> | 17.92  |
| C-reactive protein (CRP)                     | mg/l             | 72.7   |
| procalcitonin (PCT)                          | ng/ml            | 0.89   |
| body temperature                             | °C               | 36.1   |
| clinical chemistry                           |                  |        |
| red blood cells                              | pl <sup>-1</sup> | 2.8    |
| haemoglobin                                  | g/dl             | 8.4    |
| haematocrit                                  | %                | 0.25   |
| thrombocytes                                 | nl <sup>-1</sup> | 153    |
| Quick                                        | %                | 97.5   |
| activated partial thromboplastin time (APTT) | s                | 29.3   |
| creatinine                                   | mg/dl            | 1.06   |
| urea                                         | mg/dl            | 44     |
| blood glucose                                | mg/dl            | 145    |
| triglyceride                                 | mg/dl            | /      |
| cholesterol                                  | mg/dl            | /      |
| aspartate transaminase (AST)                 | U/l              | 28     |
| alanine transaminase (ALT)                   | U/l              | 42     |
| gamma-glutamyltransferase (GGT)              | U/l              | 162    |
| cholinesterase (CHE)                         | kU/l             | 4.15   |
| alkaline phosphatase (AP)                    | U/l              | 69     |
| lactate dehydrogenase (LDH)                  | U/l              | 377    |
| bilirubin                                    | mg/dl            | 1.2    |
| amylase                                      | U/l              | 19     |
| lipase                                       | U/l              | 19     |
| proteins                                     | g/l              | 46.4   |
| albumin                                      | g/dl             | 28.7   |
| sodium                                       | mmol/l           | 133    |
| potassium                                    | mmol/l           | 4.9    |
| calcium                                      | mmol/l           | 2.21   |
| magnesium                                    | mmol/l           | /      |
| chloride                                     | mmol/l           | 102    |
| phosphate                                    | mmol/l           | /      |
| blood gas analysis                           |                  |        |
| pH                                           |                  | 7.36   |

| vital parameters                   |       |        |
|------------------------------------|-------|--------|
| measurement                        | units | result |
| paO <sub>2</sub> /FiO <sub>2</sub> |       | 417    |

| laboratory diagnostics                                                     |        |        |
|----------------------------------------------------------------------------|--------|--------|
| measurement                                                                | units  | result |
| partial pressure of CO <sub>2</sub> in arterial blood (paCO <sub>2</sub> ) | mmHg   | 49     |
| partial pressure of oxygen in arterial blood (paO <sub>2</sub> )           | mmHg   | 88     |
| arterial oxygen saturation (SaO <sub>2</sub> )                             | %      | 96     |
| bicarbonate                                                                | mmol/l | 24.9   |
| lactate                                                                    | mmol/l | 0.7    |

Patient #2

| vital parameters            |                    |          |
|-----------------------------|--------------------|----------|
| measurement                 | units              | result   |
| <b>haemodynamics</b>        |                    |          |
| systolic arterial pressure  | mmHg               | 118      |
| diastolic arterial pressure | mmHg               | 55       |
| mean arterial pressure      | mmHg               | 77       |
| central venous pressure     | cmH <sub>2</sub> O | 24       |
| heart rate                  | min <sup>-1</sup>  | 63       |
| <b>catecholamine</b>        |                    |          |
| noradrenaline               | µg/kg/min          | 0.054    |
| vasopressin                 | U/kg/min           | 0        |
| dobutamine                  | mg/kg/min          | 0        |
| adrenaline                  | µg/kg/min          | 0        |
| <b>other medication</b>     |                    |          |
| hydrocortisone              | mg/24h             | 0        |
| furosemide                  | mg/24h             | 100      |
| <b>sedation</b>             |                    |          |
| clonidine                   | mg/h               | 0.06     |
| <b>fluid replacement</b>    |                    |          |
| cristalloids                | ml/24h             | 4191.9   |
| colloids                    | ml/24h             | 0        |
| enteral feeding             | ml/24h             | 90       |
| red cell concentrate        | ml/24h             | 0        |
| fresh frozen plasma         | ml/24h             | 0        |
| thrombocyte concentrate     | ml/24h             | 0        |
| coagulation factors         | U/24h              | 0        |
| <b>fluid loss</b>           |                    |          |
| urine                       | ml/24h             | 3165     |
| hemodialysis                | ml/24h             | 0        |
| abdominal drainage          | ml/24h             | 770      |
| pleural drainage            | ml/24h             | 0        |
| <b>fluid balance</b>        |                    |          |
| total                       | (+/-) ml/24h       | +346.9   |
| <b>scores</b>               |                    |          |
| RASS                        |                    | -2       |
| CAM ICU                     |                    | positive |

| laboratory diagnostics                       |                  |        |
|----------------------------------------------|------------------|--------|
| measurement                                  | units            | result |
| <b>infectiology</b>                          |                  |        |
| white blood cells                            | nl <sup>-1</sup> | 7.1    |
| C-reactive protein (CRP)                     | mg/l             | 181.8  |
| procalcitonin (PCT)                          | ng/ml            | 0.74   |
| body temperature                             | °C               | 36.7   |
| <b>clinical chemistry</b>                    |                  |        |
| red blood cells                              | pl <sup>-1</sup> | 2.7    |
| haemoglobin                                  | g/dl             | 8.1    |
| haematocrit                                  | %                | 0.25   |
| thrombocytes                                 | nl <sup>-1</sup> | 302    |
| Quick                                        | %                | 95.5   |
| activated partial thromboplastin time (APTT) | s                | 35.8   |
| creatinine                                   | mg/dl            | 0.84   |
| urea                                         | mg/dl            | 94     |
| blood glucose                                | mg/dl            | 103    |
| triglyceride                                 | mg/dl            | 172    |
| cholesterol                                  | mg/dl            | /      |
| aspartate transaminase (AST)                 | U/l              | 37     |
| alanine transaminase (ALT)                   | U/l              | 36     |
| gamma-glutamyltransferase (GGT)              | U/l              | 496    |
| cholinesterase (CHE)                         | kU/l             | 1.83   |
| alkaline phosphatase (AP)                    | U/l              | 333    |
| lactate dehydrogenase (LDH)                  | U/l              | 253    |
| bilirubin                                    | mg/dl            | 0.6    |
| amylase                                      | U/l              | 38     |
| lipase                                       | U/l              | 31     |
| proteins                                     | g/l              | 56.4   |
| albumin                                      | g/dl             | 26.2   |
| sodium                                       | mmol/l           | 134    |
| potassium                                    | mmol/l           | 4.36   |
| calcium                                      | mmol/l           | 1.97   |

| vital parameters                                |                   |        |
|-------------------------------------------------|-------------------|--------|
| measurement                                     | units             | result |
| ICDSC                                           |                   | 6      |
| ventilation                                     |                   |        |
| fraction of inspired oxygen (FiO <sub>2</sub> ) |                   | 0.3    |
| respiratory rate                                | min <sup>-1</sup> | 14     |
| mode                                            |                   | CPAP   |
| paO <sub>2</sub> /FiO <sub>2</sub>              |                   | 396.7  |

| laboratory diagnostics                                                     |        |        |
|----------------------------------------------------------------------------|--------|--------|
| measurement                                                                | units  | result |
| magnesium                                                                  | mmol/l | /      |
| chloride                                                                   | mmol/l | /      |
| phosphate                                                                  | mmol/l | /      |
| blood gas analysis                                                         |        |        |
| pH                                                                         |        | 7.36   |
| partial pressure of CO <sub>2</sub> in arterial blood (paCO <sub>2</sub> ) | mmHg   | 39     |
| partial pressure of oxygen in arterial blood (paO <sub>2</sub> )           | mmHg   | 119    |
| arterial oxygen saturation (SaO <sub>2</sub> )                             | %      | 99     |
| bicarbonate                                                                | mmol/l | 21.7   |
| base excess                                                                | mmol/l | -3.3   |

### Patient #3

| vital parameters            |                    |        |
|-----------------------------|--------------------|--------|
| measurement                 | units              | result |
| haemodynamics               |                    |        |
| systolic arterial pressure  | mmHg               | 139    |
| diastolic arterial pressure | mmHg               | 63     |
| mean arterial pressure      | mmHg               | 93     |
| central venous pressure     | cmH <sub>2</sub> O | 15     |
| heart rate                  | min <sup>-1</sup>  | 97     |
| catecholamine               |                    |        |
| noradrenaline               | µg/kg/min          | 0.032  |
| vasopressin                 | U/kg/min           | 0      |
| dobutamine                  | mg/kg/min          | 0      |
| adrenaline                  | µg/kg/min          | 0      |
| other medication            |                    |        |
| hydrocortisone              | mg/24h             | 0      |
| furosemide                  | mg/24h             | 80     |
| sedation                    |                    |        |
|                             |                    | none   |
| fluid replacement           |                    |        |
| cristalloids                | ml/24h             | 3700   |
| colloids                    | ml/24h             | 0      |
| enteral feeding             | ml/24h             | 420    |
| red cell concentrate        | ml/24h             | 0      |
| fresh frozen plasma         | ml/24h             | 0      |
| thrombocyte concentrate     | ml/24h             | 0      |
| coagulation factors         | U/24h              | 0      |
| fluid loss                  |                    |        |
| urine                       | ml/24h             | 2200   |
| hemodialysis                | ml/24h             | 0      |
| abdominal drainage          | ml/24h             | 120    |

| laboratory diagnostics                       |                  |        |
|----------------------------------------------|------------------|--------|
| measurement                                  | units            | result |
| infectiology                                 |                  |        |
| white blood cells                            | nl <sup>-1</sup> | 13.92  |
| C-reactive protein (CRP)                     | mg/l             | 198    |
| procalcitonin (PCT)                          | ng/ml            | 0.78   |
| body temperature                             | °C               | 37.4   |
| clinical chemistry                           |                  |        |
| red blood cells                              | pl <sup>-1</sup> | 2.7    |
| haemoglobin                                  | g/dl             | 8.1    |
| haematocrit                                  | %                | 0.25   |
| thrombocytes                                 | nl <sup>-1</sup> | 209    |
| Quick                                        | %                | 73.5   |
| activated partial thromboplastin time (APTT) | s                | 40.6   |
| creatinine                                   | mg/dl            | 1.57   |
| urea                                         | mg/dl            | 127    |
| blood glucose                                | mg/dl            | 105    |
| aspartate transaminase (AST)                 | U/l              | 28     |
| alanine transaminase (ALT)                   | U/l              | 22     |
| gamma-glutamyltransferase (GGT)              | U/l              | 394    |
| alkaline phosphatase (AP)                    | U/l              | 239    |
| lactate dehydrogenase (LDH)                  | U/l              | 239    |
| bilirubin                                    | mg/dl            | 1.0    |
| amylase                                      | U/l              | 13     |
| lipase                                       | U/l              | 26     |
| albumin                                      | g/dl             | 18     |
| sodium                                       | mmol/l           | 142    |

| vital parameters                                |                   |          |
|-------------------------------------------------|-------------------|----------|
| measurement                                     | units             | result   |
| pleural drainage                                | ml/24h            | 0        |
| fluid balance                                   |                   |          |
| total                                           | (+/-) ml/24h      | +1800    |
| scores                                          |                   |          |
| RASS                                            |                   | -2       |
| CAM ICU                                         |                   | positive |
| ICDSC                                           |                   | 6        |
| ventilation                                     |                   |          |
| fraction of inspired oxygen (FiO <sub>2</sub> ) |                   | 0.45     |
| respiratory rate                                | min <sup>-1</sup> | 16       |
| mode                                            |                   | CPAP     |
| paO <sub>2</sub> /FiO <sub>2</sub>              |                   | 280      |

| laboratory diagnostics                                                     |        |        |
|----------------------------------------------------------------------------|--------|--------|
| measurement                                                                | units  | result |
| potassium                                                                  | mmol/l | 4.74   |
| calcium                                                                    | mmol/l | 1.48   |
| chloride                                                                   | mmol/l | 112    |
| blood gas analysis                                                         |        |        |
| pH                                                                         |        | 7.42   |
| partial pressure of CO <sub>2</sub> in arterial blood (paCO <sub>2</sub> ) | mmHg   | 39     |
| partial pressure of oxygen in arterial blood (paO <sub>2</sub> )           | mmHg   | 107    |
| arterial oxygen saturation (SaO <sub>2</sub> )                             | %      | 96     |
| bicarbonate                                                                | mmol/l | 24.6   |
| base excess                                                                | mmol/l | 0.1    |

#### Patient #4

| vital parameters            |                    |        |
|-----------------------------|--------------------|--------|
| measurement                 | units              | result |
| haemodynamics               |                    |        |
| systolic arterial pressure  | mmHg               | 130    |
| diastolic arterial pressure | mmHg               | 50     |
| mean arterial pressure      | mmHg               | 75     |
| central venous pressure     | cmH <sub>2</sub> O | 5      |
| heart rate                  | min <sup>-1</sup>  | 82     |
| catecholamine               |                    |        |
| noradrenaline               | µg/kg/min          | 0      |
| vasopressin                 | U/kg/min           | 0      |
| dobutamine                  | mg/kg/min          | 0      |
| adrenaline                  | µg/kg/min          | 0      |
| other medication            |                    |        |
| hydrocortisone              | mg/24h             | 96     |
| furosemide                  | mg/24h             | 0      |
| sedation                    |                    |        |
|                             |                    | none   |
| fluid replacement           |                    |        |
| cristalloids                | ml/24h             | 1700   |
| colloids                    | ml/24h             | 0      |
| enteral feeding             | ml/24h             | 270    |
| red cell concentrate        | ml/24h             | 0      |
| fresh frozen plasma         | ml/24h             | 0      |
| thrombocyte concentrate     | ml/24h             | 0      |
| coagulation factors         | U/24h              | 0      |
| fluid loss                  |                    |        |
| urine                       | ml/24h             | 1060   |
| hemodialysis                | ml/24h             | 0      |
| abdominal drainage          | ml/24h             | 0      |

| laboratory diagnostics                       |                  |        |
|----------------------------------------------|------------------|--------|
| measurement                                  | units            | result |
| infectiology                                 |                  |        |
| white blood cells                            | nl <sup>-1</sup> | 26.52  |
| C-reactive protein (CRP)                     | mg/l             | 107.6  |
| procalcitonin (PCT)                          | ng/ml            | 0.76   |
| body temperature                             | °C               | 37.6   |
| clinical chemistry                           |                  |        |
| red blood cells                              | pl <sup>-1</sup> | 2.6    |
| haemoglobin                                  | g/dl             | 7.8    |
| haematocrit                                  | %                | 0.25   |
| thrombocytes                                 | nl <sup>-1</sup> | 263    |
| Quick                                        | %                | 63.5   |
| activated partial thromboplastin time (APTT) | s                | 56     |
| creatinine                                   | mg/dl            | 1.04   |
| urea                                         | mg/dl            | 108    |
| blood glucose                                | mg/dl            | 198    |
| triglyceride                                 | mg/dl            | 218    |
| cholesterol                                  | mg/dl            | 67     |
| aspartate transaminase (AST)                 | U/l              | 47     |
| alanine transaminase (ALT)                   | U/l              | 44     |
| gamma-glutamyltransferase (GGT)              | U/l              | 219    |
| cholinesterase (CHE)                         | kU/l             | 1.7    |
| alkaline phosphatase (AP)                    | U/l              | 122    |
| lactate dehydrogenase (LDH)                  | U/l              | 446    |
| bilirubin                                    | mg/dl            | 1.2    |
| amylase                                      | U/l              | 13     |

| vital parameters                                |                   |          |
|-------------------------------------------------|-------------------|----------|
| measurement                                     | units             | result   |
| pleural drainage                                | ml/24h            | 220      |
| fluid balance                                   |                   |          |
| total                                           | (+/-) ml/24h      | -700     |
| scores                                          |                   |          |
| RASS                                            |                   | -1       |
| CAM ICU                                         |                   | positive |
| ICDSC                                           |                   | 6        |
| ventilation                                     |                   |          |
| fraction of inspired oxygen (FiO <sub>2</sub> ) |                   | 0.3      |
| respiratory rate                                | min <sup>-1</sup> | 18       |
| mode                                            |                   | CPAP     |
| paO <sub>2</sub> /FiO <sub>2</sub>              |                   | 333.3    |

| laboratory diagnostics                                                     |        |        |
|----------------------------------------------------------------------------|--------|--------|
| measurement                                                                | units  | result |
| lipase                                                                     | U/l    | 13     |
| proteins                                                                   | g/l    | 35     |
| albumin                                                                    | g/dl   | 18     |
| sodium                                                                     | mmol/l | 150    |
| potassium                                                                  | mmol/l | 4.8    |
| calcium                                                                    | mmol/l | 1.88   |
| magnesium                                                                  | mmol/l | 1.18   |
| chloride                                                                   | mmol/l | 119    |
| phosphate                                                                  | mmol/l | 1.22   |
| blood gas analysis                                                         |        |        |
| pH                                                                         |        | 7.39   |
| partial pressure of CO <sub>2</sub> in arterial blood (paCO <sub>2</sub> ) | mmHg   | 43.5   |
| partial pressure of oxygen in arterial blood (paO <sub>2</sub> )           | mmHg   | 100    |
| arterial oxygen saturation (SaO <sub>2</sub> )                             | %      | 97     |
| bicarbonate                                                                | mmol/l | 25.2   |
| base excess                                                                | mmol/l | 0.8    |

#### Patient #6

| vital parameters            |                    |        |
|-----------------------------|--------------------|--------|
| measurement                 | units              | result |
| haemodynamics               |                    |        |
| systolic arterial pressure  | mmHg               | 144    |
| diastolic arterial pressure | mmHg               | 67     |
| mean arterial pressure      | mmHg               | 89     |
| central venous pressure     | cmH <sub>2</sub> O | 15     |
| heart rate                  | min <sup>-1</sup>  | 93     |
| catecholamine               |                    |        |
| noradrenaline               | µg/kg/min          | 0.143  |
| vasopressin                 | U/kg/min           | 0      |
| dobutamine                  | mg/kg/min          | 0      |
| adrenaline                  | µg/kg/min          | 0      |
| other medication            |                    |        |
| hydrocortisone              | mg/24h             | 0      |
| furosemide                  | mg/24h             | 0      |
| sedation                    |                    |        |
| morphine                    | mg/h               | 4      |
| clonidine                   | mg/h               | 0.06   |
| fluid replacement           |                    |        |
| cristalloids                | ml/24h             | 4600   |
| colloids                    | ml/24h             | 0      |
| enteral feeding             | ml/24h             | 1000   |
| red cell concentrate        | ml/24h             | 550    |

| laboratory diagnostics                       |                  |        |
|----------------------------------------------|------------------|--------|
| measurement                                  | units            | result |
| infectiology                                 |                  |        |
| white blood cells                            | nl <sup>-1</sup> | 21.25  |
| C-reactive protein (CRP)                     | mg/l             | 154.2  |
| procalcitonin (PCT)                          | ng/ml            | 7.55   |
| body temperature                             | °C               | 36.2   |
| clinical chemistry                           |                  |        |
| red blood cells                              | pl <sup>-1</sup> | 2.3    |
| haemoglobin                                  | g/dl             | 7.0    |
| haematocrit                                  | %                | 0.2    |
| thrombocytes                                 | nl <sup>-1</sup> | 70     |
| Quick                                        | %                | 60.6   |
| activated partial thromboplastin time (APTT) | s                | 36.6   |
| creatinine                                   | mg/dl            | 0.85   |
| urea                                         | mg/dl            | 56     |
| blood glucose                                | mg/dl            | 124    |
| triglyceride                                 | mg/dl            | 107    |
| cholesterol                                  | mg/dl            | 62     |
| aspartate transaminase (AST)                 | U/l              | 59     |
| alanine transaminase (ALT)                   | U/l              | 40     |

| vital parameters                                |                   |          |
|-------------------------------------------------|-------------------|----------|
| measurement                                     | units             | result   |
| fresh frozen plasma                             | ml/24h            | 0        |
| thrombocyte concentrate                         | ml/24h            | 0        |
| coagulation factors                             | U/24h             | 0        |
| fluid loss                                      |                   |          |
| urine                                           | ml/24h            | 1300     |
| hemodialysis                                    | ml/24h            | 1300     |
| abdominal drainage                              | ml/24h            | 760      |
| pleural drainage                                | ml/24h            | 0        |
| fluid balance                                   |                   |          |
| total                                           | (+/-) ml/24h      | +2790    |
| scores                                          |                   |          |
| RASS                                            |                   | 0        |
| CAM ICU                                         |                   | negative |
| ICDSC                                           |                   | 0        |
| ventilation                                     |                   |          |
| fraction of inspired oxygen (FiO <sub>2</sub> ) |                   | 0.65     |
| respiratory rate                                | min <sup>-1</sup> | 15       |
| mode                                            |                   | BIPAP    |
| paO <sub>2</sub> /FiO <sub>2</sub>              |                   | 101.5    |

| laboratory diagnostics                                                     |        |        |
|----------------------------------------------------------------------------|--------|--------|
| measurement                                                                | units  | result |
| gamma-glutamyltransferase (GGT)                                            | U/l    | 68     |
| cholinesterase (CHE)                                                       | kU/l   | 0.61   |
| alkaline phosphatase (AP)                                                  | U/l    | 216    |
| lactate dehydrogenase (LDH)                                                | U/l    | 611    |
| bilirubin                                                                  | mg/dl  | 0.6    |
| amylase                                                                    | U/l    | <5     |
| lipase                                                                     | U/l    | 17     |
| proteins                                                                   | g/l    | 39.4   |
| albumin                                                                    | g/dl   | 22.9   |
| sodium                                                                     | mmol/l | 144    |
| potassium                                                                  | mmol/l | 4.6    |
| calcium                                                                    | mmol/l | 2.02   |
| magnesium                                                                  | mmol/l | 0.78   |
| chloride                                                                   | mmol/l | 113    |
| phosphate                                                                  | mmol/l | 1.01   |
| blood gas analysis                                                         |        |        |
| pH                                                                         |        | 7.42   |
| partial pressure of CO <sub>2</sub> in arterial blood (paCO <sub>2</sub> ) | mmHg   | 41     |
| partial pressure of oxygen in arterial blood (paO <sub>2</sub> )           | mmHg   | 62     |
| arterial oxygen saturation (SaO <sub>2</sub> )                             | %      | 98     |
| bicarbonate                                                                | mmol/l | 26.1   |
| base excess                                                                | mmol/l | 1.9    |
