# Supplementary material for: Muscarinic M1 receptors modulate endotoxemia-induced loss of synaptic plasticity
Source: Springer Nature journal article supplement (doi:10.1186/s40478-015-0245-8), 2015-11-04
Supplement: MOESM3 [file 25665804]

Supplementary Table 6

| results sheet for Figure 2         |                                     |                                |                                         |                                     |                                        |                                    |                                       |                                   |
|------------------------------------|-------------------------------------|--------------------------------|-----------------------------------------|-------------------------------------|----------------------------------------|------------------------------------|---------------------------------------|-----------------------------------|
| mean ± SEM                         | control<br>(n = 15 cells / 11 rats) | LPS<br>(n = 10 cells / 7 rats) | control + apamin (n = 6 cells / 4 rats) | LPS + apamin (n = 8 cells / 5 rats) | control + physo (n = 6 cells / 4 rats) | LPS + physo (n = 5 cells / 5 rats) | control + TBPB (n = 7 cells / 3 rats) | LPS + TBPB (n = 7 cells / 5 rats) |
| number of action potentials        | 11.0 ± 1.3                          | 9.8 ± 1.1                      | 9.8 ± 1.5                               | 13.5 ± 2.1                          | 15.7 ± 1.8                             | 16.4 ± 1.7                         | 18.4 ± 2.5                            | 13.2 ± 1.0                        |
| resting membrane potential (mV)    | -56.0 ± 1.7                         | -55.8 ± 1.2                    | -60.0 ± 1.2                             | -59.6 ± 1.5                         | -55.7 ± 1.4                            | -51.8 ± 1.8                        | -59.3 ± 0.9                           | -58.0 ± 1.4                       |
| paired pulse ratio with 50 ms IPI  | 1.40 ± 0.08                         | 1.34 ± 0.06                    | 1.40 ± 0.07                             | 1.53 ± 0.07                         | 1.37 ± 0.08                            | 1.48 ± 0.08                        | 1.50 ± 0.06                           | 1.50 ± 0.09                       |
| paired pulse ratio with 100 ms IPI | 1.17 ± 0.08                         | 1.20 ± 0.06                    | 1.24 ± 0.09                             | 1.25 ± 0.08                         | 1.31 ± 0.05                            | 1.32 ± 0.05                        | 1.37 ± 0.05                           | 1.33 ± 0.07                       |

| results sheet for Figure 3                 |                                     |                               |                                         |                                     |                                        |                                    |                                       |                                   |
|--------------------------------------------|-------------------------------------|-------------------------------|-----------------------------------------|-------------------------------------|----------------------------------------|------------------------------------|---------------------------------------|-----------------------------------|
| mean ± SEM                                 | control<br>(n = 14 cells / 11 rats) | LPS<br>(n = 8 cells / 7 rats) | control + apamin (n = 6 cells / 4 rats) | LPS + apamin (n = 8 cells / 5 rats) | control + physo (n = 6 cells / 4 rats) | LPS + physo (n = 5 cells / 5 rats) | control + TBPB (n = 7 cells / 3 rats) | LPS + TBPB (n = 6 cells / 4 rats) |
| AHP amplitude after single AP (mV)         | -10.8 ± 0.5                         | -13.8 ± 0.9                   | -7.8 ± 0.9                              | -7.4 ± 0.7                          | -9.2 ± 0.3                             | -10.5 ± 0.7                        | -9.3 ± 0.5                            | -8.4 ± 1.1                        |
| hyperpolarization amplitude after AP burst | -7.0 ± 0.7                          | 10.1 ± 0.5                    | -5.4 ± 0.4                              | -4.4 ± 0.6                          | -4.1 ± 0.4                             | -7.9 ± 1.1                         | -4.4 ± 0.5                            | -5.1 ± 0.7                        |

| results sheet for Figure 4 |                                     |                                |                                         |                                     |                                        |                                    |                                       |                                   |
|----------------------------|-------------------------------------|--------------------------------|-----------------------------------------|-------------------------------------|----------------------------------------|------------------------------------|---------------------------------------|-----------------------------------|
| mean ± SEM                 | control<br>(n = 15 cells / 11 rats) | LPS<br>(n = 10 cells / 7 rats) | control + apamin (n = 6 cells / 4 rats) | LPS + apamin (n = 8 cells / 5 rats) | control + physo (n = 6 cells / 4 rats) | LPS + physo (n = 8 cells / 8 rats) | control + TBPB (n = 7 cells / 3 rats) | LPS + TBPB (n = 7 cells / 5 rats) |
| normalized EPSC amplitude  | 1.78 ± 0.05                         | 1.08 ± 0.02                    | 1.9 ± 0.1                               | 1.77 ± 0.06                         | 1.55 ± 0.03                            | 1.31 ± 0.02                        | 1.64 ± 0.02                           | 1.40 ± 0.03                       |

| results sheet for Figure 5     |                                   |                                |                                         |                                     |                                        |                                    |                                       |                                   |
|--------------------------------|-----------------------------------|--------------------------------|-----------------------------------------|-------------------------------------|----------------------------------------|------------------------------------|---------------------------------------|-----------------------------------|
| mean ± SEM                     | control<br>(n = 8 cells / 5 rats) | LPS<br>(n = 10 cells / 7 rats) | control + apamin (n = 6 cells / 4 rats) | LPS + apamin (n = 8 cells / 5 rats) | control + physo (n = 6 cells / 4 rats) | LPS + physo (n = 6 cells / 6 rats) | control + TBPB (n = 7 cells / 3 rats) | LPS + TBPB (n = 7 cells / 5 rats) |
| number of spikes               | 7.6 ± 0.9                         | 7.9 ± 0.5                      | 9.0 ± 1.3                               | 10.3 ± 1.3                          | 16.5 ± 0.9                             | 9.7 ± 1.5                          | 15.1 ± 1.3                            | 10.3 ± 1.3                        |
| AUC (mVms x 10 <sup>-3</sup> ) | 25442 ± 3135                      | 22102 ± 1392                   | 19058 ± 2148                            | 32351 ± 2763                        | 24617 ± 1173                           | 33606 ± 2531                       | 24819 ± 1193                          | 28862 ± 1427                      |
