# Supplementary material for: Muscarinic M1 receptors modulate endotoxemia-induced loss of synaptic plasticity
Source: Springer Nature journal article supplement (doi:10.1186/s40478-015-0245-8), 2015-11-04

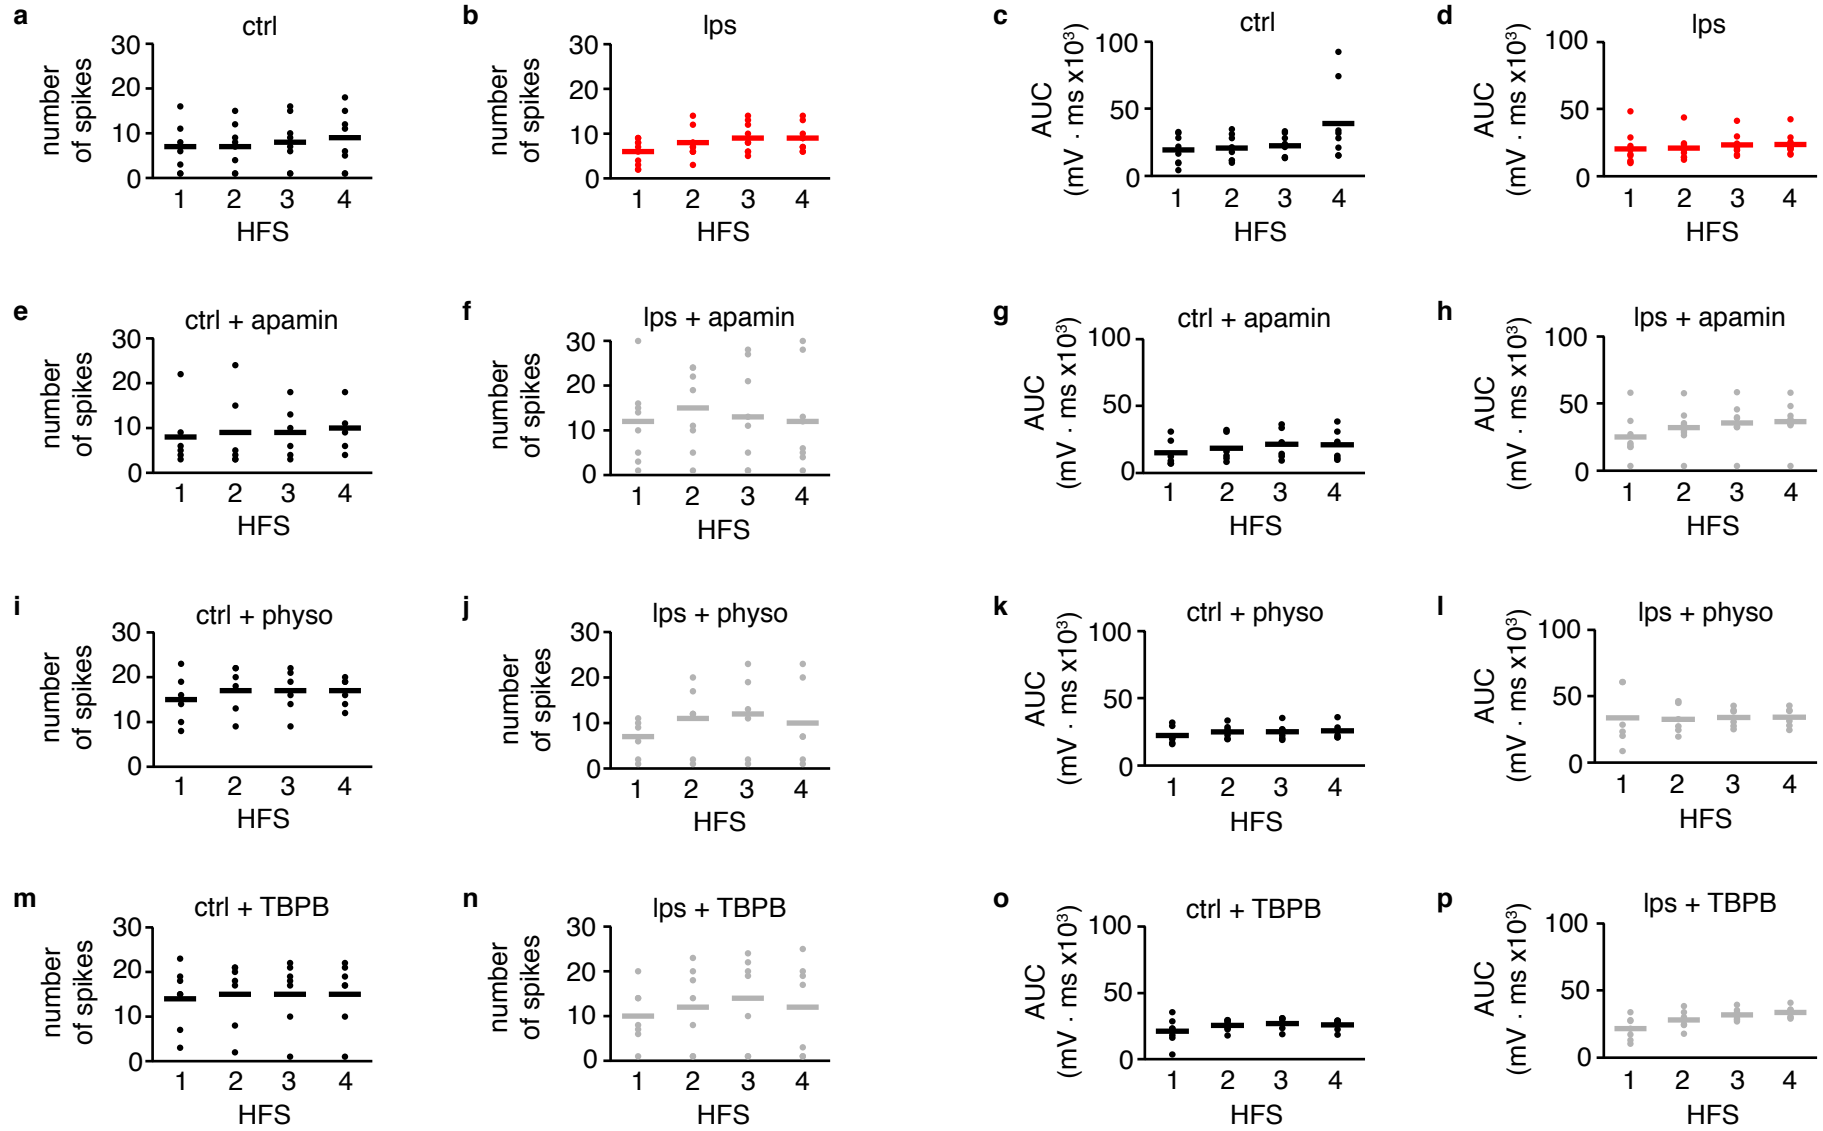

Supplement: MOESM5 [file 25665804]
